# Supplementary material for: Molecular Network-Based Identification of Tramadol Metabolites in a Fatal Tramadol Poisoning
Source: MDPI journal article supplement (doi:10.3390/metabo12070665), 2022-07-19
Supplement: s1 [file s1]

# **Molecular Network-Based Identification of Tramadol Metabolites in a Fatal Tramadol Poisoning**

Romain Magny<sup>1,2,\*</sup>, Nicolas Auzeil<sup>2</sup>, Bertrand Lefrère<sup>1</sup>, Bruno Mégarbane<sup>3,4</sup>, Pascal Houzé<sup>1,5</sup> and  
Laurence Labat<sup>1,4</sup>

<sup>1</sup> Laboratoire de Toxicologie, Fédération de Toxicologie, AH-HP, Hôpital Lariboisière, Paris, France

<sup>2</sup> Université de Paris, CNRS, CiTCoM, Paris, France

<sup>3</sup> Réanimation Médicale et Toxicologique, Fédération de Toxicologie de l'AH-HP, Hôpital Lariboisière, Paris, France

<sup>4</sup> Inserm, UMRS-1144, Université Paris Cité, Paris, France

<sup>5</sup> Faculté de Sciences Pharmaceutiques Et Biologiques, Unité de Technologies Chimiques Et Biologiques Pour La Santé (UTCBS), Université Paris Cité, CNRS UMR8258, Inserm U1022, Paris, France.

\*Corresponding authors: [romain.magny@inserm.fr](mailto:romain.magny@inserm.fr)

**Figure S1. Analytical features of desmethyl metabolites of tramadol.** (A) Extracted ion chromatogram at  $m/z$  236.1645 corresponding to N,O-desmethyl-tramadol and (B) extracted ion chromatogram at  $m/z$  222.1489 corresponding to N,N,O-desmethyl-tramadol.

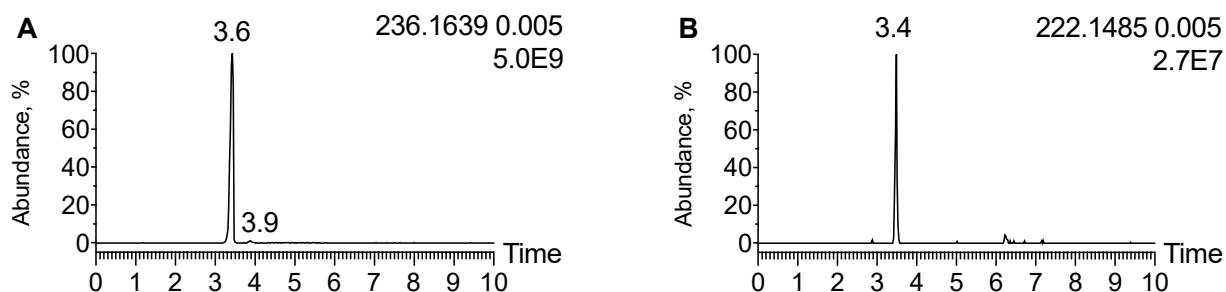

**Figure S2. Isomers of OH-Tramadol.** Extracted ion chromatogram at  $m/z$  280.1905 corresponding to the  $[M+H]^+$  ion of OH-tramadol. Note that the peak at  $t_R = 4.62$  min correspond to the N-oxyde tramadol metabolite.

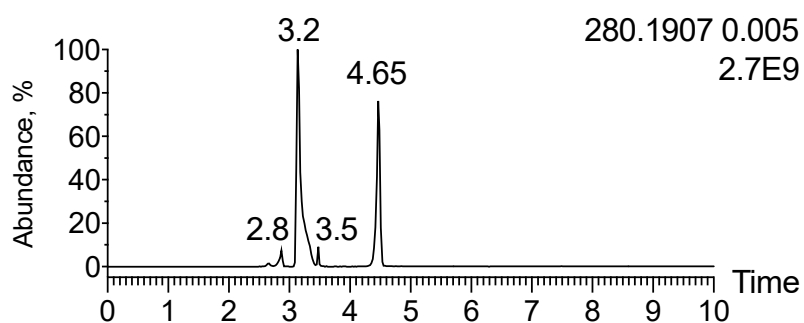

**Figure S3. Focus on the molecular network of *N*-demethylated metabolites of tramadol generated using LC-HRMS/MS data acquired in positive ion mode at a 17.5 eV collision energy.**

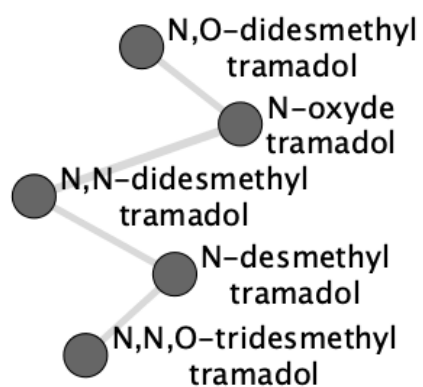

**Table S1. Level of metabolite identification of each annotated metabolites according to the metabolomics standards initiative guidelines.**

| <b>Metabolites</b>                      | <b>Identification level</b> |
|-----------------------------------------|-----------------------------|
| Tramadol                                | 1                           |
| O-Desmethyl-Tramadol                    | 1                           |
| N-Desmethyl-Tramadol                    | 1                           |
| N,N-Desmethyl-Tramadol                  | 2                           |
| N,N,O-Desmethyl-Tramadol                | 2                           |
| N,O-Desmethyl-Tramadol                  | 1                           |
| OH-Tramadol                             | 2                           |
| OH-N-Desmethyl-Tramadol                 | 2                           |
| OH-Didesmethyl-Tramadol                 | 2                           |
| Keto-Tramadol                           | 2                           |
| O-Desmethyl-Tramadol-Glucuronide        | 2                           |
| N,O-Desmethyl-Tramadol-Glucuronide      | 2                           |
| OH-Tramadol-Glucuronide                 | 2                           |
| OH-O-Desmethyl-Tramadol-Glucuronide     | 2                           |
| OH-N,N-Desmethyl-Tramadol-Glucuronide   | 2                           |
| O-Desmethyl-Tramadol-Sulfate            | 2                           |
| N,N,O-Desmethyl-Tramadol-Sulfate        | 2                           |
| N,O-Desmethyl-Tramadol-Sulfate          | 2                           |
| N-oxide-Tramadol                        | 2                           |
| OH-O-Desmethyl-Tramadol                 | 2                           |
| Desmethyl-keto-tramadol-N-Glucuronide   | 2                           |
| Didesmethyl-keto-tramadol-N-Glucuronide | 2                           |
| O-Methyl-Tramadol                       | 2                           |
| N-Methyl-Tramadol                       | 2                           |
| OH-Methyl-Tramadol                      | 2                           |
| DiOH-Methyl-Tramadol                    | 2                           |

**Table S2. Limit of quantification, linear dynamic range, linearity of the plot of area response ratio *versus* concentration, correlation coefficient for tramadol, N-desmethyl-tramadol and O-desmethyl-tramadol.** Tramadol-C13, D3, HCl was used as internal standard.

| Metabolites          | LOQ (µg/L) | Linear dynamic range | Linear regression equation | Correlation coefficient (R <sup>2</sup> ) |
|----------------------|------------|----------------------|----------------------------|-------------------------------------------|
| Tramadol             | 2.5        | 400                  | $y = 0.01628x + 0.1132$    | 0.998                                     |
| O-desmethyl-tramadol | 2.5        | 400                  | $y = 0.00490x + 0.0025$    | 0.996                                     |
| N-desmethyl-tramadol | 2.5        | 400                  | $y = 0.01248x - 0.02008$   | 0.998                                     |



|                                         | Patient #1 |       | Patient #2 |       | Patient #3 |       | Patient #4 |       |
|-----------------------------------------|------------|-------|------------|-------|------------|-------|------------|-------|
|                                         | Plasma     | Urine | Plasma     | Urine | Plasma     | Urine | Plasma     | Urine |
| Quantification                          |            |       |            |       |            |       |            |       |
| Tramadol                                | 200        | N.A.  | 490        | N.A.  | 23         | N.A.  | 5.1        | N.A.  |
| O-Desmethyl-Tramadol                    | 91         | N.A.  | 143        | N.A.  | 7          | N.A.  | /          | N.A.  |
| N-Desmethyl-Tramadol                    | 39         | N.A.  | 37         | N.A.  | 5          | N.A.  | /          | N.A.  |
| Identification                          |            |       |            |       |            |       |            |       |
| N-oxide-Tramadol                        | D.         | D.    | D.         | D.    | D.         | D.    | N.D.       | N.D.  |
| OH-O-Desmethyl-Tramadol                 | N.D.       | N.D.  | N.D.       | N.D.  | N.D.       | N.D.  | N.D.       | N.D.  |
| Desmethyl-keto-tramadol-N-Glucuronide   | D.         | D.    | D.         | D.    | N.D.       | D.    | N.D.       | N.D.  |
| Didesmethyl-keto-tramadol-N-Glucuronide | N.D.       | N.D.  | N.D.       | N.D.  | N.D.       | N.D.  | N.D.       | N.D.  |
| O-Methyl-Tramadol                       | D.         | D.    | D.         | D.    | N.D.       | N.D.  | N.D.       | N.D.  |
| N-Methyl-Tramadol                       | D.         | D.    | D.         | D.    | N.D.       | N.D.  | N.D.       | N.D.  |
| OH-Methyl-Tramadol                      | N.D.       | N.D.  | N.D.       | N.D.  | N.D.       | N.D.  | N.D.       | N.D.  |
| DiOH-Methyl-Tramadol                    | N.D.       | N.D.  | N.D.       | N.D.  | N.D.       | N.D.  | N.D.       | N.D.  |
| Total                                   | 16         | 16    | 15         | 16    | 12         | 14    | 4          | 6     |
